# Supplementary material for: Exosomal MALAT1 sponges miR-26a/26b to promote the invasion and metastasis of colorectal cancer via FUT4 enhanced fucosylation and PI3K/Akt pathway
Source: J Exp Clin Cancer Res. 2020 Mar 24;39:54. doi: 10.1186/s13046-020-01562-6 (PMC7092616; doi:10.1186/s13046-020-01562-6)
Supplement: Supplementary file 7 — Additional file 7. [file 13046_2020_1562_MOESM7_ESM.xlsx]

## Sheet: Sheet1
	Raw Intensity						Normalized Intensity
GeneSymbol	[C1](raw)	[C2](raw)	[C3](raw)	[T1](raw)	[T2](raw)	[T3](raw)	[C1](normalized)	[C2](normalized)	[C3](normalized)	[T1](normalized)	[T2](normalized)	[T3](normalized)
GALNT7	578.79	641.562	530.039	26554.2	22698.5	27641.4	8.9736	9.45733	9.22616	14.7216	14.5699	14.7102
GALNT1	587.479	281.794	319.879	15309.6	15144.3	16727	8.99439	8.30148	8.51102	13.9081	13.9813	13.9503
FUT4	488.296	511.543	426.837	7093.34	6401.7	7529.8	8.72533	9.14836	8.92425	12.783	12.7242	12.7614
ST6GALNAC6	11.3707	10.4469	13.0216	44.7067	64.8924	58.2666	3.09989	3.76912	3.96872	5.39332	6.06119	5.64818
ST3GAL3	86.3627	9.56266	13.6198	161.067	130.545	153.484	6.22799	3.66134	4.03246	7.24917	7.08769	7.07822
GALNT4	702.566	469.111	486.845	2228.32	1278.08	1813.83	9.24148	9.02034	9.10665	11.0641	10.4107	10.7051
B4GALNT4	53.419	36.6817	29.0754	105.039	123.379	139.279	5.52114	5.47094	5.08293	6.62177	7.00524	6.94102
B3GNT2	356.046	201.304	230.487	721.325	543.641	776.672	8.27387	7.83013	8.03791	9.43658	9.17338	9.4784
GALNT10	1236.33	852.386	883.509	2022.79	2502.41	2720.86	10.0579	9.86711	9.95459	10.9374	11.3686	11.2675
FUT1	108.507	70.5204	74.3857	140.317	198.738	219.113	6.55587	6.37092	6.42696	7.04905	7.70067	7.61125
B3GALT5	2140.55	2303.17	2095.47	3325.8	5231.17	5321.38	10.851	11.3075	11.219	11.6523	12.4331	12.2624
GALNT9	124.266	111.643	116.423	267.83	214.481	259.493	6.755	7.01428	7.0594	7.97977	7.81415	7.86742
FUT9	3142.09	2588.27	2411	5747.67	5204.53	6119.86	11.414	11.4652	11.4215	12.4612	12.4286	12.4745
MGAT3	1474.58	919.679	945.557	2460	1847.52	2346.77	10.3088	9.97292	10.0612	11.2033	10.9212	11.0638
B3GALNT2	469.339	341.876	340.059	695.312	712.921	794.782	8.66305	8.58067	8.59809	9.37975	9.57039	9.51399
ST6GAL1	5368.59	4382.24	4105.11	7369.6	9304.09	9100.27	12.1598	12.2227	12.1738	12.8344	13.2716	13.0435
B4GALNT3	9542.15	6551.57	6781.51	15449.7	11852.4	14238.2	12.9836	12.7881	12.8904	13.9241	13.63	13.7081
B3GNT7	197.326	137.994	152.019	249.208	303.535	331.155	7.42425	7.30706	7.44236	7.877	8.32593	8.21803
ALG11	714.697	613.019	587.53	777.886	1220.99	1266.69	9.27048	9.39465	9.36957	9.53536	10.3426	10.1868
GALNT18	1574.81	1085.33	1080.82	1984.32	1887.32	2190.4	10.4047	10.2193	10.2507	10.9099	10.9481	10.9693
ST3GAL6	504.897	364.291	364.386	750.35	546.991	698.983	8.77693	8.67368	8.69758	9.4905	9.18201	9.31996
FUT2	5617.73	5478.68	4779.35	7036.82	8549.12	9332.33	12.2227	12.536	12.3921	12.7712	13.1442	13.0921
ALG9	2996.59	2213.95	2274.39	4493.14	2875.87	3870.6	11.3458	11.2521	11.3309	12.0965	11.5679	11.7979
GALNT11	18858.5	10833.3	12252.3	14949.5	22278.2	22932.8	13.9448	13.5043	13.7432	13.8652	14.5361	14.4115
MGAT5B	48.3687	40.588	55.912	57.567	47.2649	101.834	5.37552	5.60539	6.01879	5.76325	5.60279	6.46746
B4GALNT1	33.8748	24.8746	20.7627	41.5188	32.141	38.5223	4.85396	4.92918	4.61579	5.28554	5.05142	5.02333
DPM1	608.899	415.329	418.536	694.441	618.892	709.713	9.04745	8.85049	8.89819	9.37741	9.36217	9.34663
B3GNT4	146.177	84.8822	92.9074	169.481	125.21	156.235	6.99209	6.62994	6.74428	7.32332	7.02756	7.10425
ALG1	321.33	265.754	265.948	426.22	355.567	371.49	8.12155	8.21968	8.25025	8.65462	8.55771	8.3884
B4GALT1	3318.82	2041.06	2164.03	3218.7	3291.3	3592.05	11.485	11.1364	11.2614	11.6041	11.7636	11.6904
FUT11	11503.8	9150.71	9106.08	12978.5	12076.3	13702.7	13.2483	13.2716	13.3126	13.6558	13.6532	13.6438
ALG10B	5099.38	3530.22	3651.71	5233.61	4944.97	5571.48	12.0883	11.9193	12.0113	12.3202	12.3592	12.3272
B3GNT6	41.3473	24.3359	23.6402	49.9193	32.9764	29.7431	5.14117	4.89855	4.79003	5.55079	5.0884	4.63179
ALG6	7377.16	4783.73	5199.79	5617.41	7568.2	8413.83	12.6173	12.3465	12.5166	12.4222	12.9698	12.936
B4GALT7	77.0294	34.1374	36.1539	64.2528	58.1623	59.9332	6.06478	5.36583	5.39308	5.91642	5.90451	5.69176
MGAT4B	6361.62	4763.64	4630.65	5772.8	6224.95	6913.18	12.4041	12.3413	12.3426	12.4683	12.6884	12.6317
GALNT2	153.294	96.8364	121.472	173.386	113.18	152.069	7.06441	6.81228	7.12784	7.35525	6.8797	7.06463
GALNT12	2532.69	1528.88	1655.57	2161.48	1893.64	2365.17	11.1069	10.7104	10.8679	11.0222	10.952	11.0786
B3GALNT1	26902.3	15729.5	18378.8	28503.7	16574.4	22953.2	14.456	14.0287	14.3056	14.8213	14.1103	14.4156
ST3GAL2	3226.55	2481.71	2433.86	3168.43	2722.41	3155.71	11.4477	11.4093	11.4351	11.5835	11.4881	11.4976
B3GALT6	27810.6	23837.8	21015.9	21421.6	28252.2	30263.7	14.5006	14.6108	14.4949	14.4166	14.9036	14.8571
ALG13	1389.05	940.642	1042.95	1430.28	1015.42	1257.88	10.2175	10.0025	10.2026	10.4238	10.0835	10.1748
ALG10	922.999	656.334	708.239	840.069	744.382	868.998	9.63832	9.48973	9.63272	9.65223	9.63592	9.64393
FUT10	19076.4	13545.2	14645.4	14358.7	16708.1	18785.3	13.9636	13.8097	13.9791	13.7995	14.1236	14.1254
ALG1L	74.1024	50.9429	55.3741	77.3587	41.5258	68.5544	6.00786	5.92293	6.00436	6.19149	5.42076	5.88676
B4GALT4	303.844	217.903	220.51	276.303	238.039	256.097	8.04329	7.93812	7.97931	8.02266	7.97059	7.84755
MGAT5	556.417	441.89	420.823	548.126	416.982	506.803	8.91713	8.93707	8.90678	9.02593	8.78418	8.84787
B3GALT4	2684.53	1586.11	1907.73	2558.11	1508.38	2246.93	11.1887	10.7645	11.0712	11.2637	10.6425	11.0087
ALG8	10747.5	9648.88	8982.11	7732.93	10564.3	11340.5	13.1549	13.3433	13.2896	12.9089	13.4605	13.3788
B4GALT2	406061	389467	384384	406169	373663	396634	18.6052	18.5773	18.6168	18.6168	18.4934	18.5722
B3GNT8	209.111	128.038	177.134	144.656	170.221	190.284	7.5012	7.19817	7.66798	7.09256	7.47879	7.40197
B4GALT6	2094.12	1767	1851.59	2253.62	1418.42	1932.73	10.8168	10.9184	11.0311	11.0805	10.555	10.7986
B4GALT5	4398.98	3191.71	3404.86	3879.61	3222.72	3661.09	11.8793	11.7675	11.9088	11.8878	11.7332	11.7211
MGAT1	9792.52	6336.23	6598.54	7444.05	6467.83	7853.16	13.0269	12.7479	12.8466	12.8496	12.7383	12.8255
GALNT16	73.513	42.9986	47.7076	51.3895	43.0891	61.1185	5.99303	5.6801	5.79063	5.59223	5.47068	5.71761
B4GALT3	191.065	138.266	131.647	150.848	141.523	142.679	7.37752	7.31063	7.24349	7.14986	7.20194	6.97376
ST3GAL5	9912.92	6098.9	6503.3	7049.39	6550.04	7394.11	13.047	12.6929	12.8196	12.7745	12.759	12.7323
ALG14	522.006	335.207	367.446	428.753	288.673	408.936	8.82193	8.55319	8.71018	8.66305	8.25193	8.52507
ALG5	4004.44	3038.03	2994.42	2891.89	2822.64	3377.42	11.7486	11.6944	11.7195	11.4471	11.542	11.5973
B4GALNT2	142.743	113.282	113.83	106.857	102.957	124.33	6.95559	7.03364	7.02773	6.64474	6.74755	6.7728
ST3GAL4	54.5608	54.949	47.8976	44.0446	54.3376	42.1215	5.55552	6.0254	5.79635	5.37194	5.80532	5.16727
B3GNT3	4829.27	2654.15	3275.96	3563.98	2564.21	3468.69	12.0197	11.5052	11.8505	11.757	11.4	11.6383
FUT6	1057.78	700.636	868.775	892.778	691.738	707.387	9.83154	9.58229	9.92894	9.73994	9.5226	9.34085
MGAT4A	22629.7	16731.3	15709.7	18934.1	13087.6	15797.3	14.2053	14.1097	14.088	14.2253	13.7631	13.8746
GALNT5	153.75	110.226	122.553	135.967	82.6886	116.201	7.06927	6.99773	7.14049	7.00313	6.4322	6.66724
DPM2	5140.62	4628.36	4061.06	4509.62	3335.39	3938.16	12.1003	12.3	12.1519	12.106	11.7822	11.8231
GALNT6	36991.7	30714.5	26042.8	21130.1	29025.1	28562.4	14.882	14.9574	14.7981	14.3995	14.9432	14.7518
ALG12	236.001	159.083	170.658	145.495	149.06	172.549	7.68152	7.50479	7.61102	7.10017	7.27965	7.25359
B3GNTL1	3450.94	2448.76	2544.65	2524.2	1850.96	2401.76	11.5436	11.3912	11.4935	11.2416	10.9225	11.0937
FUT5	8414.33	6241.19	5819.86	4440.63	5463.19	5721.52	12.8159	12.7255	12.6707	12.0757	12.4871	12.3667
FUT7	2550.32	2607.14	2209.52	1105.22	2282.4	2123.48	11.1181	11.4768	11.2964	10.0485	11.2364	10.9254
FUT8	2691.46	1971.88	1998.53	3515.44	2815.5	3504.55	11.195	11.0871	11.1451	11.737	11.5367	11.6518
MGAT2	17710.5	13512	12458.3	9769.85	8797.18	10548.6	13.8596	13.8066	13.7678	13.2371	13.1888	13.2644
ALG1L2	38191.5	29060.2	29303	14773.5	22953.4	22905.7	14.9406	14.8726	14.9574	13.8417	14.5894	14.4093
B3GALT2	2503.13	1638.7	1780.17	1220.17	890.091	1171.28	11.0856	10.8119	10.977	10.1999	9.88905	10.0693
ST6GALNAC2	1212.34	852.886	893.228	646.479	413.81	544.344	10.0252	9.86802	9.97405	9.26967	8.77269	8.95519
DPM3	156.697	77.1849	87.6283	79.3292	36.205	51.9347	7.09583	6.49988	6.65948	6.22649	5.22114	5.48079
ST6GAL2	101419	97064.5	81733.3	39554.4	50394.4	47059.4	16.3797	16.5568	16.4469	15.3121	15.7217	15.4928
ST6GALNAC5	22091.6	26167.7	21138.7	10598.9	9875.69	11030	14.1712	14.7379	14.5032	13.3573	13.3693	13.3354
B3GNT5	5776.89	4440.41	4342.17	1578.83	1680.08	1883.98	12.2612	12.2412	12.2579	10.5736	10.7913	10.7587
ST8SIA5	40957.3	30371	33648.1	12547.5	9758.93	11959.4	15.0466	14.9337	15.1457	13.6042	13.3539	13.458
ST6GALNAC4	905.486	868.21	785.661	293.889	158.47	208.246	9.61033	9.88974	9.78702	8.11391	7.36962	7.53936
ALG2	2246.93	1706.6	1756.44	371.263	274.45	336.966	10.9254	10.8679	10.9564	8.45325	8.17775	8.24226
ST3GAL1	80373.5	87072.4	71365.6	10217.1	8306.05	9565.1	16.0125	16.4161	16.2193	13.3007	13.102	13.1257
ST8SIA6	158.638	88.7084	109.402	11.2173	8.54374	15.313	7.11792	6.69073	6.97267	3.41897	3.12726	3.61823
ALG3	12559.9	12145.2	10761	828.24	633.503	765.107	13.3627	13.6695	13.5449	9.63259	9.39599	9.45201
