# Supplementary material for: Exosomal MALAT1 sponges miR-26a/26b to promote the invasion and metastasis of colorectal cancer via FUT4 enhanced fucosylation and PI3K/Akt pathway
Source: J Exp Clin Cancer Res. 2020 Mar 24;39:54. doi: 10.1186/s13046-020-01562-6 (PMC7092616; doi:10.1186/s13046-020-01562-6)
Supplement: Supplementary file 8 — Additional file 8. [file 13046_2020_1562_MOESM8_ESM.xlsx]

## Sheet: Sheet1
	Raw Intensity						Normalized Intensity
GeneSymbol	[C1](raw)	[C2](raw)	[C3](raw)	[T1](raw)	[T2](raw)	[T3](raw)	[C1](normalized)	[C2](normalized)	[C3](normalized)	[T1](normalized)	[T2](normalized)	[T3](normalized)
MALAT1	33.4907	32.0909	32.9055	127.102	187.609	188.899	4.83668	5.27947	5.26243	6.90111	7.62358	7.39092
LINC00205	9996.86	8717.86	7814.13	10041.3	7868.46	9802.63	13.0593	13.1966	13.1004	13.2743	13.0229	13.1554
SNHG5	14374.8	12566.1	12350	11440.9	14303.5	14527.1	13.5579	13.7144	13.7538	13.466	13.891	13.7427
SNHG6	65504.3	70741.3	57978.5	106332	123304	126197	15.7468	16.0878	15.9346	16.7459	16.9981	16.9965
HCG11	11738.6	13676.5	10568.2	7238.49	12927.5	12023.6	13.2746	13.8299	13.5159	12.8091	13.7474	13.4682
NEAT1	319.453	239.679	219.987	311.27	270.66	344.306	8.11492	8.07452	7.97604	8.20171	8.15724	8.27364
